# Supplementary material for: Metabolomic Signatures of Alzheimer’s Disease Indicate Brain Region-Specific Neurodegenerative Progression
Source: MDPI journal article supplement (doi:10.3390/ijms241914769), 2023-09-30
Supplement: s1 [file s1]

| Metabolite                      | Brain Regions |       |       |       |       |    |     |    |
|---------------------------------|---------------|-------|-------|-------|-------|----|-----|----|
|                                 | BA 9          | BA 17 | BA 22 | BA 24 | BA 40 | DN | HPC | PB |
| Acetylcholine                   | ↑             |       | ↓     | ↓     | ↓     | ↓  |     |    |
| 2-Amino-3-Phosphonoprionic Acid | ↑             | ↓     | ↓     |       | ↓     |    | ↓   |    |
| Arginine                        |               | ↓     |       |       | ↓     |    |     |    |
| Citric Acid                     | ↑             |       | ↑     | ↑     |       | ↑  | ↑   | ↑  |
| Creatine                        | ↓             | ↑     | ↑     |       |       |    | ↑   |    |
| Ethanol                         | ↓             | ↑     | ↓     | ↑     | ↑     | ↑  |     |    |
| Gamma-Aminobutyric Acid (GABA)  | ↑             | ↑     | ↑     | ↑     | ↑     |    | ↑   |    |
| Glycyl-Glycine                  | ↑             | ↓     |       | ↓     |       | ↓  |     | ↓  |
| Glycerol                        | ↑             | ↑     | ↓     |       |       |    | ↑   | ↑  |
| Glucose                         | ↑             | ↓     |       | ↓     | ↓     |    |     | ↓  |
| Isoleucine                      |               | ↓     | ↓     | ↓     | ↓     | ↓  | ↓   | ↓  |
| Leucine                         | ↓             | ↓     | ↓     | ↓     | ↓     |    | ↓   | ↓  |
| Malonic Acid                    | ↑             | ↑     | ↑     | ↑     |       | ↑  | ↑   |    |
| N-acetylaspartate (NAA)         | ↑             | ↑     | ↑     | ↑     | ↑     |    | ↑   | ↑  |
| Phenylalanine                   | ↑             | ↓     | ↓     | ↓     | ↓     |    | ↓   | ↓  |
| Phosphorylcholine               | ↑             | ↓     | ↓     | ↓     | ↓     |    | ↑   |    |
| Serine                          |               | ↓     | ↓     |       | ↓     | ↓  | ↓   |    |
| Tyrosine                        | ↑             | ↓     | ↓     |       | ↓     |    | ↓   | ↓  |
| Valine                          | ↑             | ↓     | ↓     | ↓     | ↓     |    | ↓   | ↓  |

**Supplemental table S1:** Summary of the most notable significant metabolites for BA9, BA17, BA22, BA24, BA40, DN, HPC, and PD and their regulation (↑ upregulated; ↓ downregulated).
